# Supplementary material for: Crystal structures of hydrated rare-earth bis(trifluoromethylsulfonyl)imide salts
Source: Royal Society of Chemistry journal article supplement (doi:10.1039/c5ce01270h), 2015-01-01
Supplement: c5ce01270h1.pdf [file c5ce01270h1.pdf]

Supporting information

## Crystal Structures of Hydrated Rare-Earth Bis(trifluoromethylsulfonyl)imide Salts

Tom Vander Hoogerstraete, Neil R. Brooks, Bieke Onghena, Luc Van Meervelt and

Koen Binnemans\*

## Full experimental details:

**Scandium(III) bis(trifluoromethylsulfonyl)imide:** Scandium(III) oxide (10 mmol, 1.404 g) and a solution of 80 wt% hydrogen bis(trifluoromethylsulfonyl)imide (29 mmol, 10.160 g) in water (30mL) heated for two hours. Crystals of  $[\text{Sc}(\text{H}_2\text{O})_7][\text{Tf}_2\text{N}]_3 \cdot \text{H}_2\text{O}$  grown at room temperature on a Schlenk line.

**Lanthanum(III) bis(trifluoromethylsulfonyl)imide:** Lanthanum(III) oxide (4.95 mmol, 1.614 g) and a solution of 80 wt% hydrogen bis(trifluoromethylsulfonyl)imide (30.0 mmol, 10.56 g) in water (30 mL) heated for one hour. Crystals of  $\text{La}(\text{H}_2\text{O})_3(\text{Tf}_2\text{N})_3$  grown at room temperature on a Schlenk line. Crystals of  $\text{La}(\text{H}_2\text{O})_3(\text{Tf}_2\text{N})_3 \cdot 2.5\text{H}_2\text{O}$  obtained if  $\text{HTf}_2\text{N}$  remained from the initial reaction.

**Cerium(III) bis(trifluoromethylsulfonyl)imide:**  $\text{Ce}_2(\text{CO}_3)_3$  (3.68 g, 6.12 mmol) and a solution of 80 wt% hydrogen bis(trifluoromethylsulfonyl)imide (4.30 g, 12.2 mmol) in water (30 mL) were mixed under reduced pressure (20 mbar) at 60 °C. The remaining  $\text{Ce}_2(\text{CO}_3)_3$  was filtered off after one hour. Crystals of  $\text{Ce}(\text{H}_2\text{O})_3(\text{Tf}_2\text{N})_3$  grown at room temperature on a Schlenk line.

**Praseodymium(III) bis(trifluoromethylsulfonyl)imide:** Praseodymium(III,IV)oxide ( $\text{Pr}_6\text{O}_{11}$ ) (3.81 mmol, 3.90 g) and a solution of 80 wt% hydrogen bis(trifluoromethylsulfonyl)imide (30.0 mmol, 10.56 g) in water (30 mL) heated for one hour. Crystals of  $\text{Pr}(\text{H}_2\text{O})_3(\text{Tf}_2\text{N})_3$  grown at room temperature on a Schlenk line.

**Neodymium(III) bis(trifluoromethylsulfonyl)imide:** Neodymium(III) oxide (4.99 mmol, 1.68 g) and a solution of 80 wt% hydrogen bis(trifluoromethylsulfonyl)imide (30.0 mmol, 10.56 g) in water (30mL) heated for one hour. Crystals of  $\text{Nd}(\text{H}_2\text{O})_3(\text{Tf}_2\text{N})_3$  grown at room temperature on a Schlenk line.

**Samarium(III) bis(trifluoromethylsulfonyl)imide:** Samarium(III) oxide (6.28 mmol, 2.19 g) was added to a solution of 80 wt% hydrogen bis(trifluoromethylsulfonyl)imide (0.030 mol, 10.56 g) in water (30mL) and heated for one hour. Crystals of  $\text{Sm}(\text{H}_2\text{O})_5(\text{Tf}_2\text{N})_3$  grown at room temperature on Schlenk line.

**Gadolinium(III) bis(trifluoromethylsulfonyl)imide:** Gadolinium(III) oxide (6.02 mmol, 2.18 g) and a solution of 80 wt% hydrogen bis(trifluoromethylsulfonyl)imide (12.0 mmol, 4.23 g) in water (30mL) heated for one hour. Crystals of fully hydrated  $\text{Gd}(\text{Tf}_2\text{N})_3$  grown at room temperature on Schlenk line. Crystals of  $\text{Gd}(\text{H}_2\text{O})_3(\text{Tf}_2\text{N})_3$  grown at 60°C on the Schlenk line.

**Terbium(III) bis(trifluoromethylsulfonyl)imide:** Terbium(III) oxide (6.12 mmol, 2.19 g) and a solution of 80 wt% hydrogen bis(trifluoromethylsulfonyl)imide (12.0 mmol, 4.22 g) in water (30mL) and heated for one hour. Crystals of  $\text{Tb}(\text{H}_2\text{O})_5(\text{Tf}_2\text{N})_3$  grown at room temperature on Schlenk line.

**Dysprosium(III) bis(trifluoromethylsulfonyl)imide:** Dysprosium(III) oxide (5.17 mmol, 1.930 g) and a solution of 80 wt% hydrogen bis(trifluoromethylsulfonyl)imide (30.0 mmol, 10.62 g) in water (30mL) heated for 1 hour. Crystals of fully hydrated  $\text{Dy}(\text{Tf}_2\text{N})_3$  grown at room temperature on Schlenk line. Crystals of  $\text{Dy}(\text{H}_2\text{O})_5(\text{Tf}_2\text{N})_3$  grown at 60°C on the Schlenk line.

**Holmium(III) bis(trifluoromethylsulfonyl)imide:** Holmium(III) oxide (10.33 mmol, 3.905 g) and a solution of 80 wt% hydrogen bis(trifluoromethylsulfonyl)imide (63.3 mmol, 22.250 g) in water (30mL) and heated for one hour. Crystals of fully hydrated  $\text{Ho}(\text{Tf}_2\text{N})_3$  grown at room temperature on Schlenk line.

**Erbium(III) bis(trifluoromethylsulfonyl)imide:** Erbium(III) oxide (9.68 mmol, 3.706 g) and a solution of 80 wt% hydrogen bis(trifluoromethylsulfonyl)imide (55.1 mmol, 19.365 g) in water (30mL) heated for one hour. Crystals of fully hydrated  $\text{Er}(\text{Tf}_2\text{N})_3$  grown at room temperature on Schlenk line. Crystals of  $\text{Er}(\text{H}_2\text{O})_5(\text{Tf}_2\text{N})_3$  grown at 60°C on the Schlenk line.

**Thulium(III) bis(trifluoromethylsulfonyl)imide:** Thulium(III) oxide (5.95 mmol mol, 2.29 g) and a solution of 80 wt% hydrogen bis(trifluoromethylsulfonyl)imide (11.9 mmol, 4.18 g) in water and (30mL) heated for one hour. A solid material could be grown at room temperature on Schlenk line but no crystals suitable for X-ray diffraction could be isolated. On one occasion a crystal of probable formula  $[\text{Tm}_6(\text{O})(\text{OH})_8(\text{OH}_2)_{16}(\text{Tf}_2\text{N})_2][\text{Tf}_2\text{N}]_6 \cdot x\text{H}_2\text{O}$  was found after several days at 60°C on the Schlenk line.

**Ytterbium (III) bis(trifluoromethylsulfonyl)imide:** Ytterbium(III) oxide (5.91 mmol, 2.31 g) and a solution of 80 wt% hydrogen bis(trifluoromethylsulfonyl)imide (11.9 mmol, 4.19 g) in water (50mL) stirred under reflux conditions (100 °C) for two hours. Crystals of fully hydrated  $\text{Yb}(\text{Tf}_2\text{N})_3$  grown at room temperature on Schlenk line. Crystals of  $\text{Yb}(\text{H}_2\text{O})_5(\text{Tf}_2\text{N})_3$  grown at 60°C on the Schlenk line.

**Lutetium(III) bis(trifluoromethylsulfonyl)imide:** Lutetium(III) oxide (5.91 mmol, 2.35 g) and a solution of 80 wt% hydrogen bis(trifluoromethylsulfonyl)imide (11.8 mmol, 4.15 g) in water (50mL) stirred under reflux conditions (100 °C) for two hours. Crystals of fully hydrated  $\text{Lu}(\text{Tf}_2\text{N})_3$  grown at room temperature on Schlenk line.

**Yttrium(III) bis(trifluoromethylsulfonyl)imide:** Yttrium(III) oxide (5.49 mmol, 1.240 g) and a solution of 80 wt% hydrogen bis(trifluoromethylsulfonyl)imide (30.5 mmol, 10.709 g) in water (50mL) stirred under reflux conditions (100 °C) for two hours. The reaction mixture turned into a clear solution after approximately 10 minutes. Water and acid were removed by rotary evaporation in vacuo to obtain white crystals. Crystals of fully hydrated  $Y(Tf_2N)_3$  grown at room temperature on Schlenk line.

#### Additional Figures:

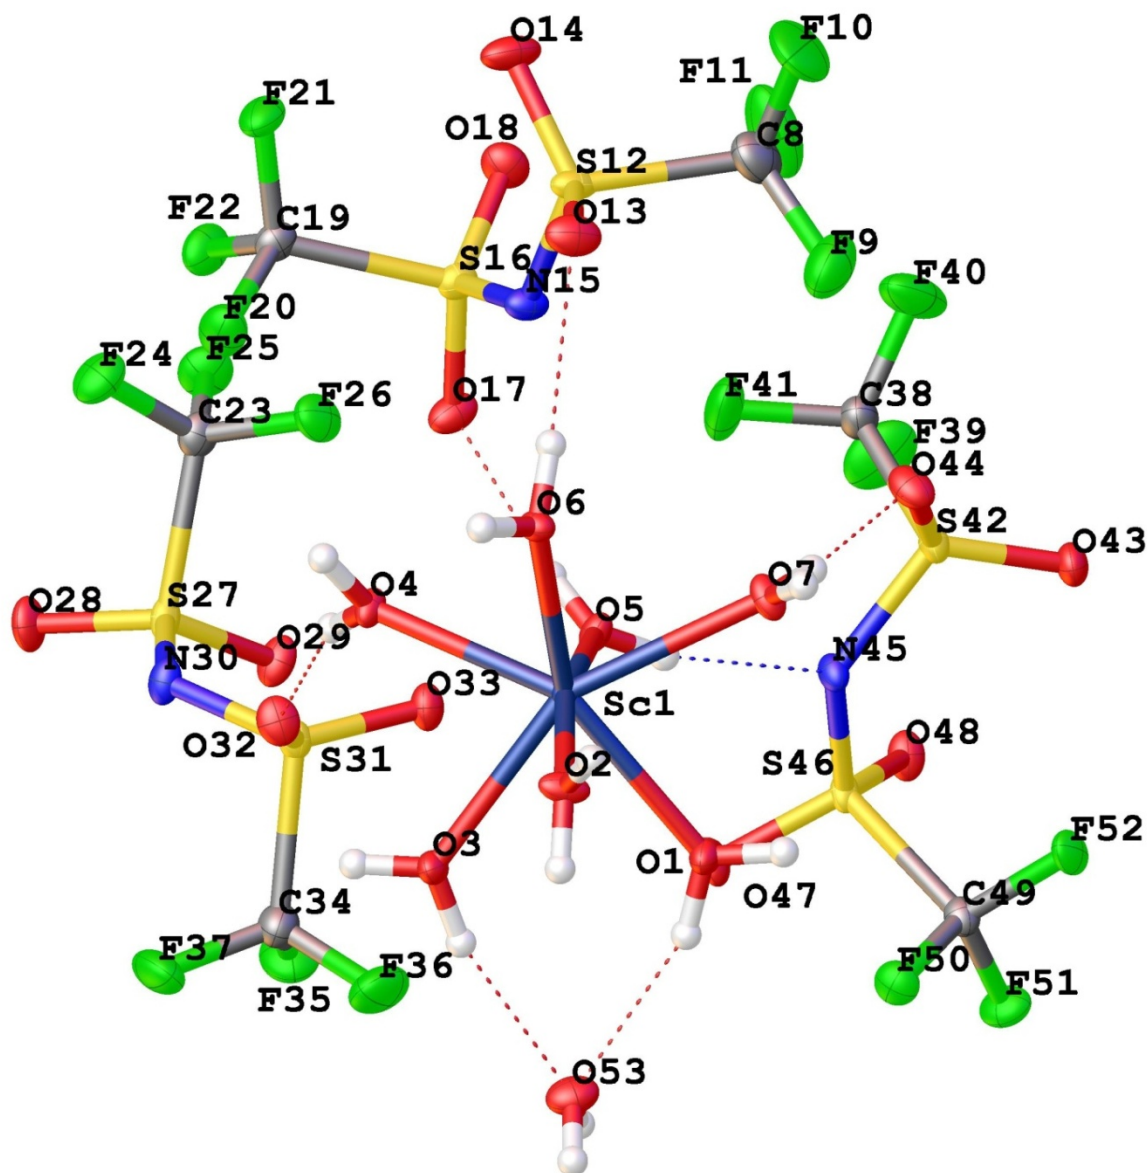

Figure S1. View of the crystal structure of  $[Sc(H_2O)_7][Tf_2N]_3 \cdot H_2O$  showing the crystallographic asymmetric unit and the displacement ellipsoids at the 50% probability level.

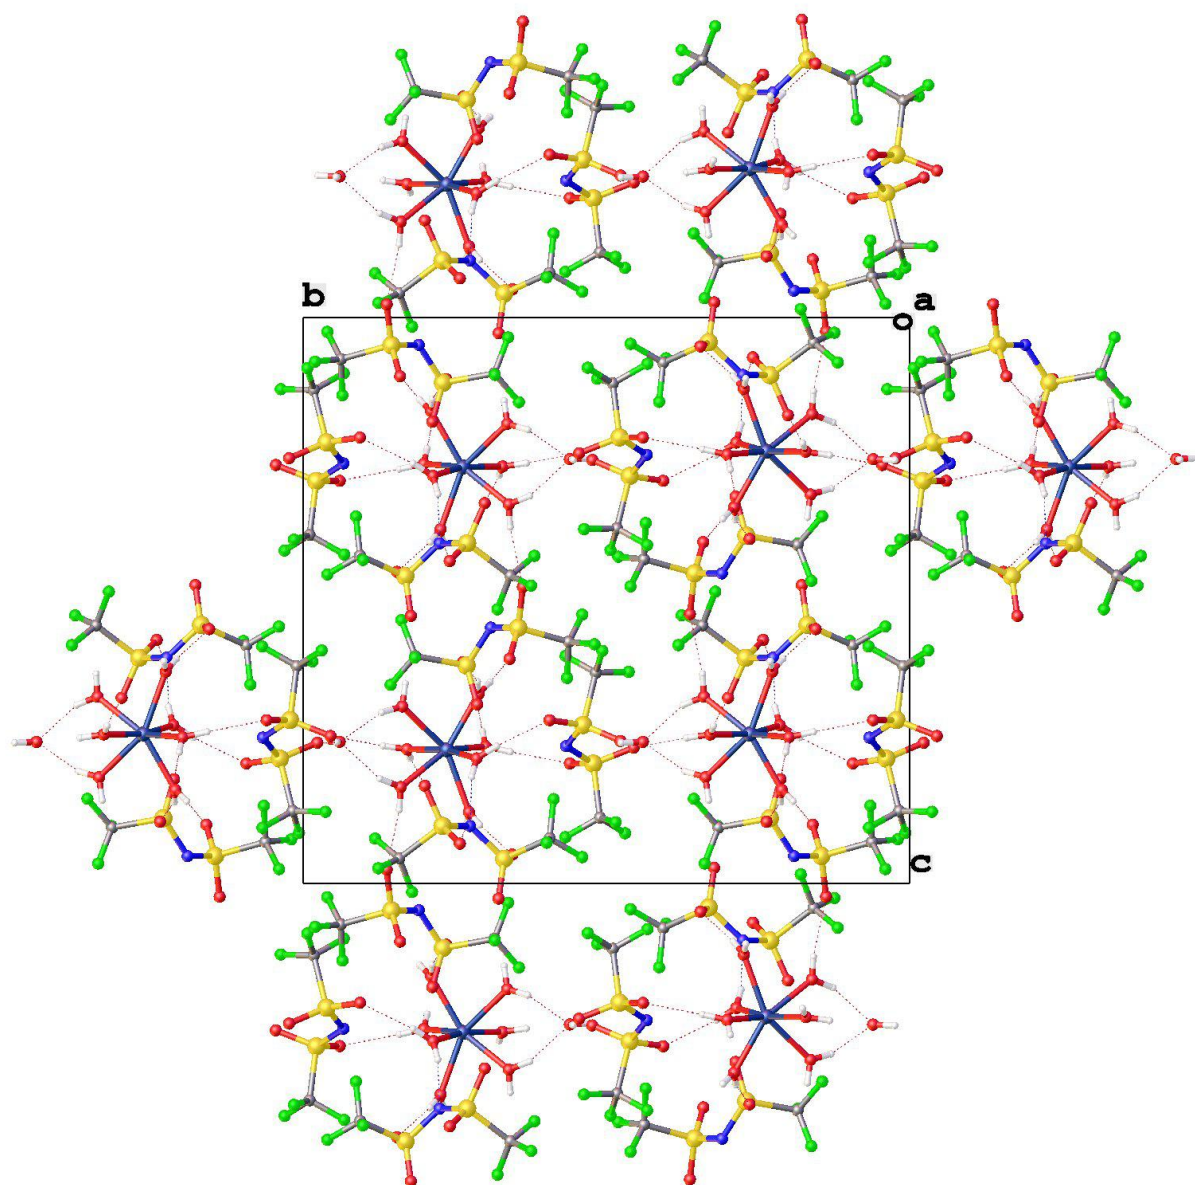

Figure S2. View of the packing in the crystal structure of  $[\text{Sc}(\text{H}_2\text{O})_7][\text{Tf}_2\text{N}]_3 \cdot \text{H}_2\text{O}$ .

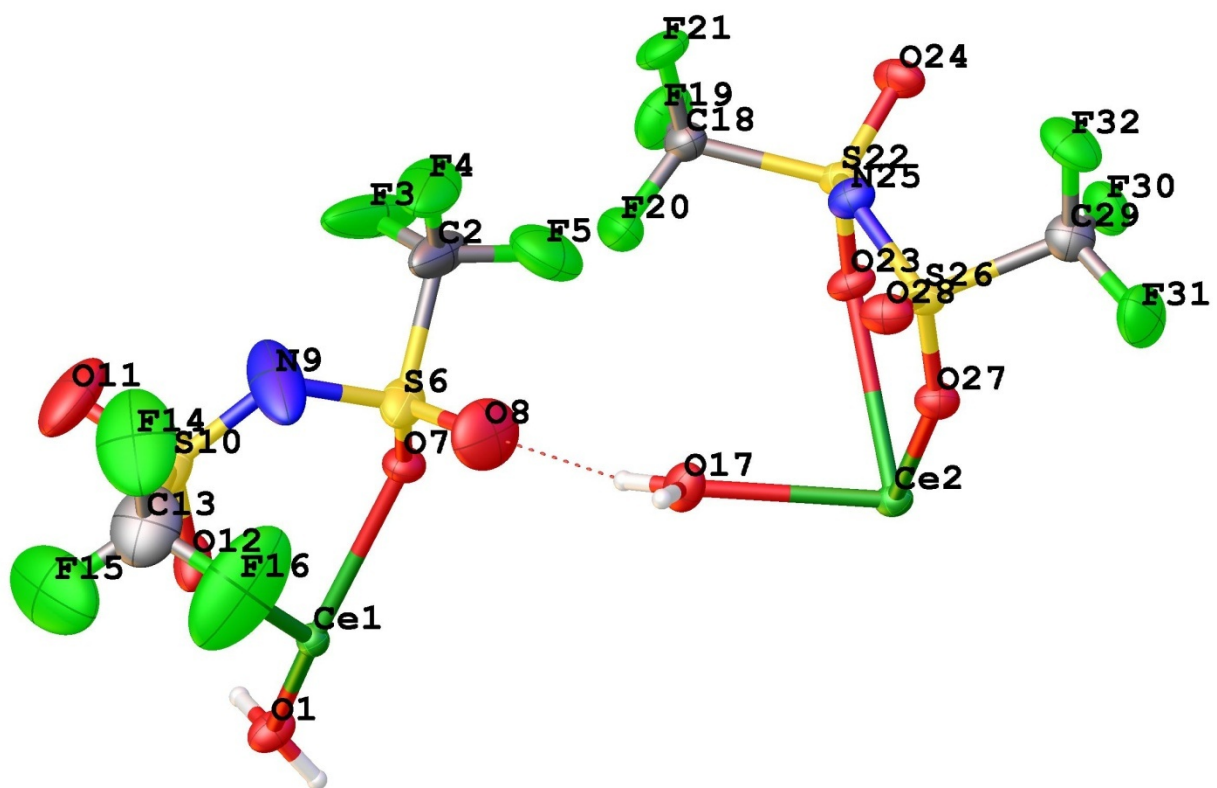

Figure S3. View of the crystal structure of  $\text{Ce}(\text{H}_2\text{O})_3(\text{Tf}_2\text{N})_3$  showing the crystallographic asymmetric unit and the displacement ellipsoids at the 50% probability level.

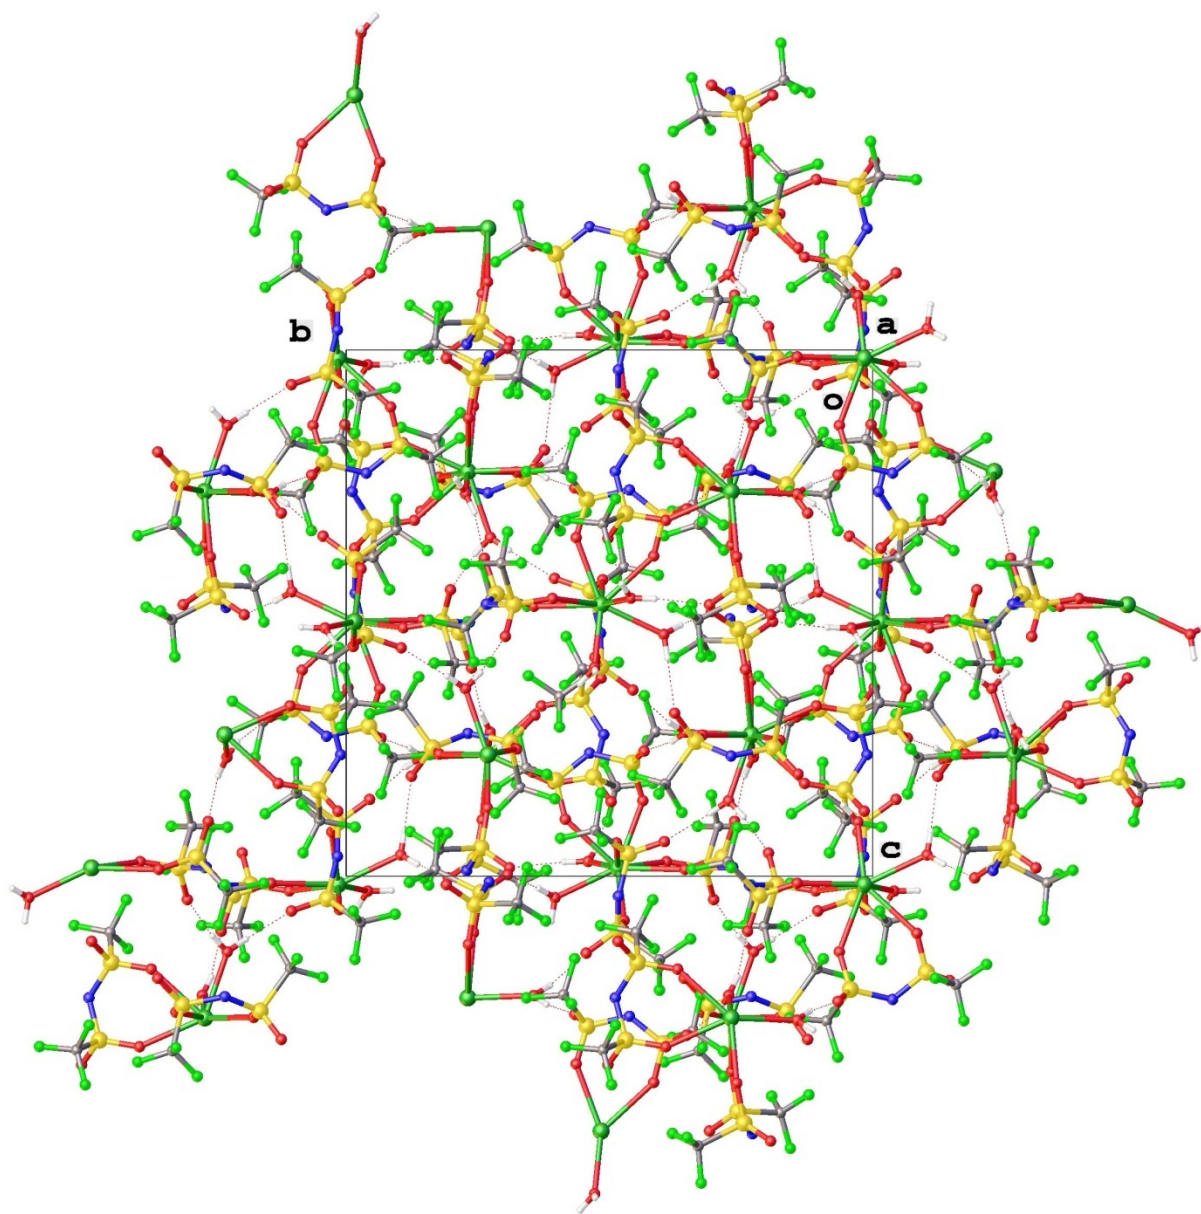

Figure S4. View of the packing in the crystal structure of  $\text{Ce}(\text{H}_2\text{O})_3(\text{Tf}_2\text{N})_3$ .



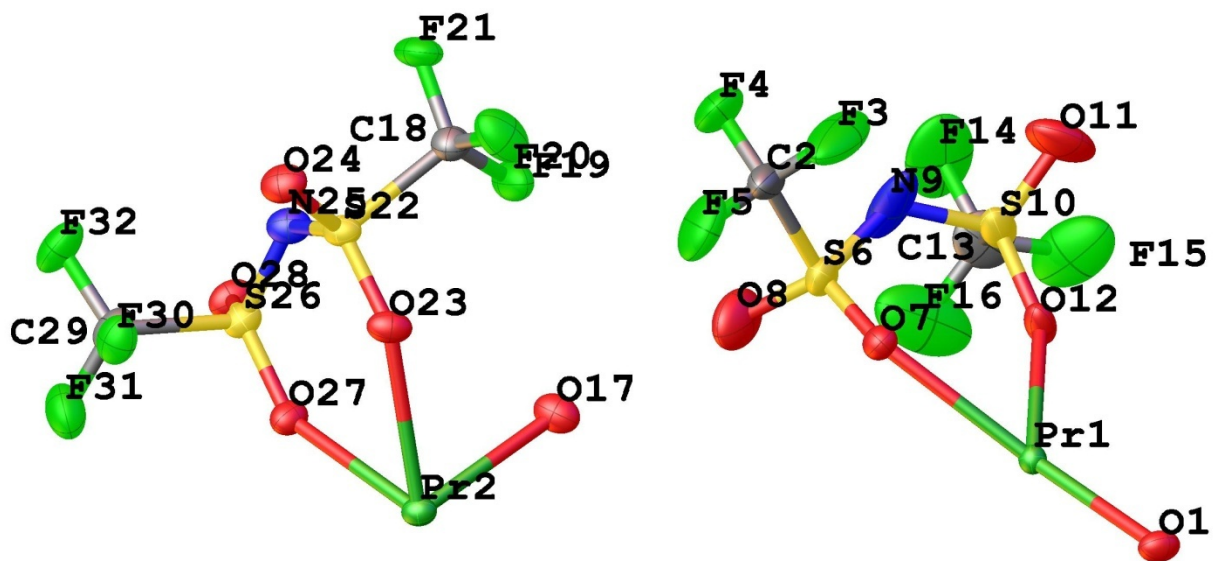

Figure S5. View of the crystal structure of  $\text{Pr}(\text{H}_2\text{O})_3(\text{Tf}_2\text{N})_3$  showing the crystallographic asymmetric unit and the displacement ellipsoids at the 50% probability level.

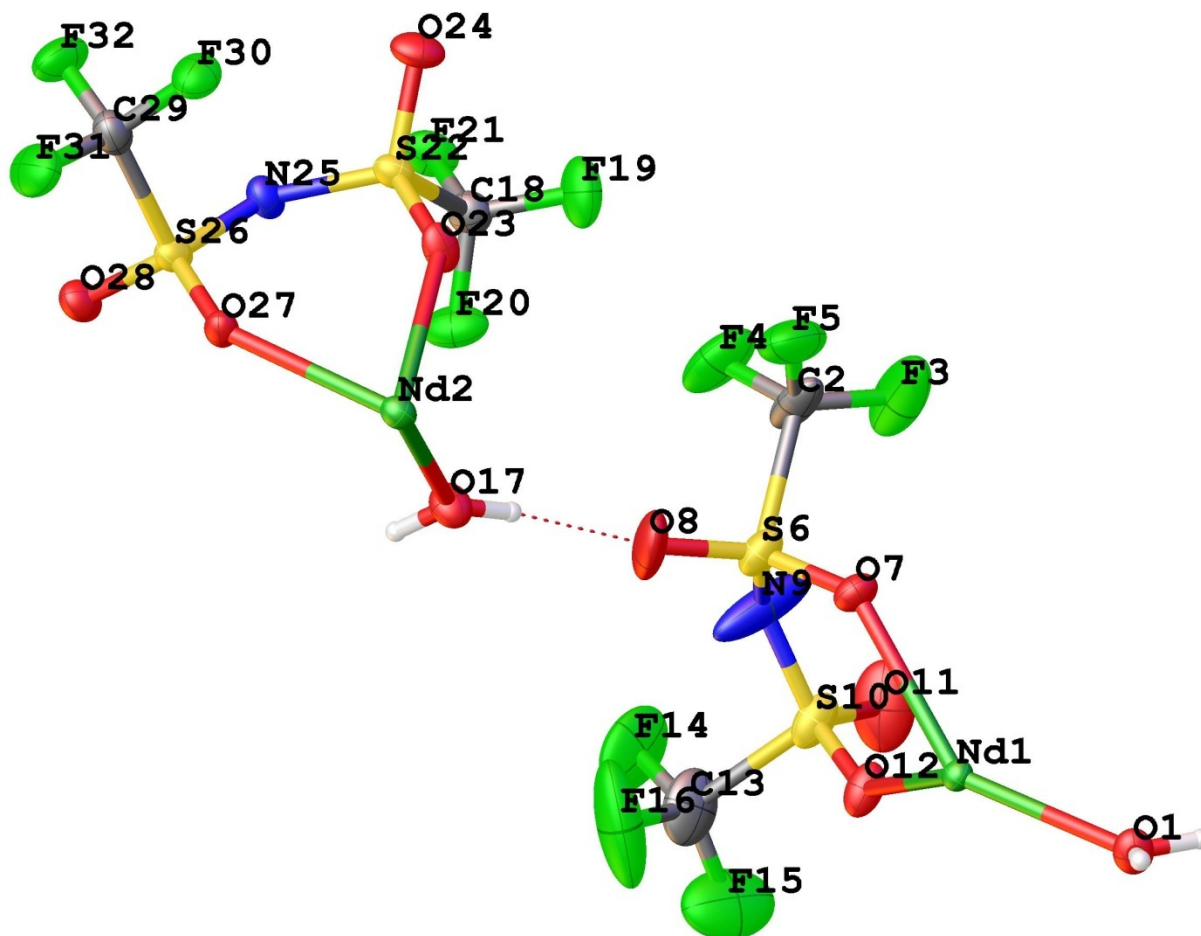

Figure S6. View of the crystal structure of  $\text{Nd}(\text{H}_2\text{O})_3(\text{Tf}_2\text{N})_3$  showing the crystallographic asymmetric unit and the displacement ellipsoids at the 50% probability level.



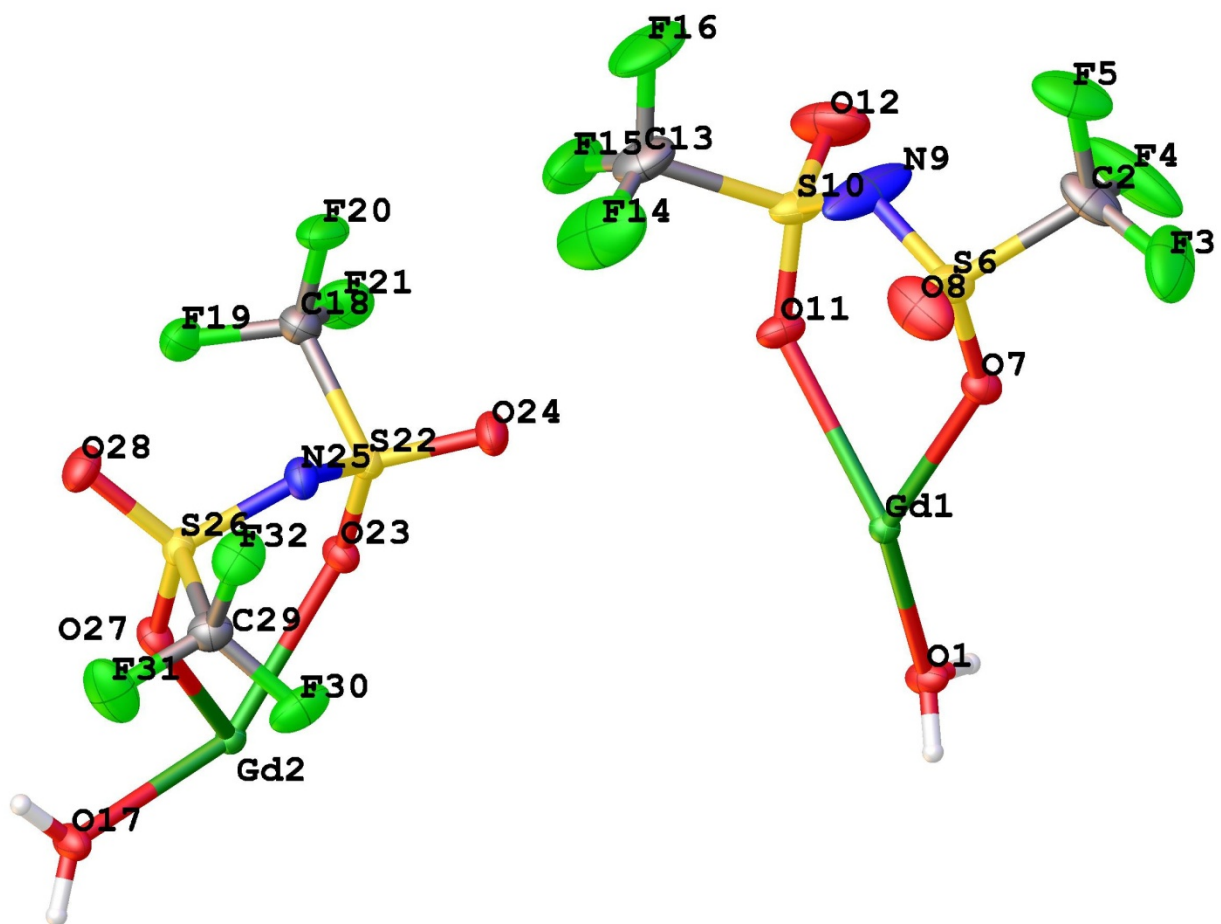

Figure S7. View of the crystal structure of  $\text{Gd}(\text{H}_2\text{O})_3(\text{Tf}_2\text{N})_3$  showing the crystallographic asymmetric unit and the displacement ellipsoids at the 50% probability level.

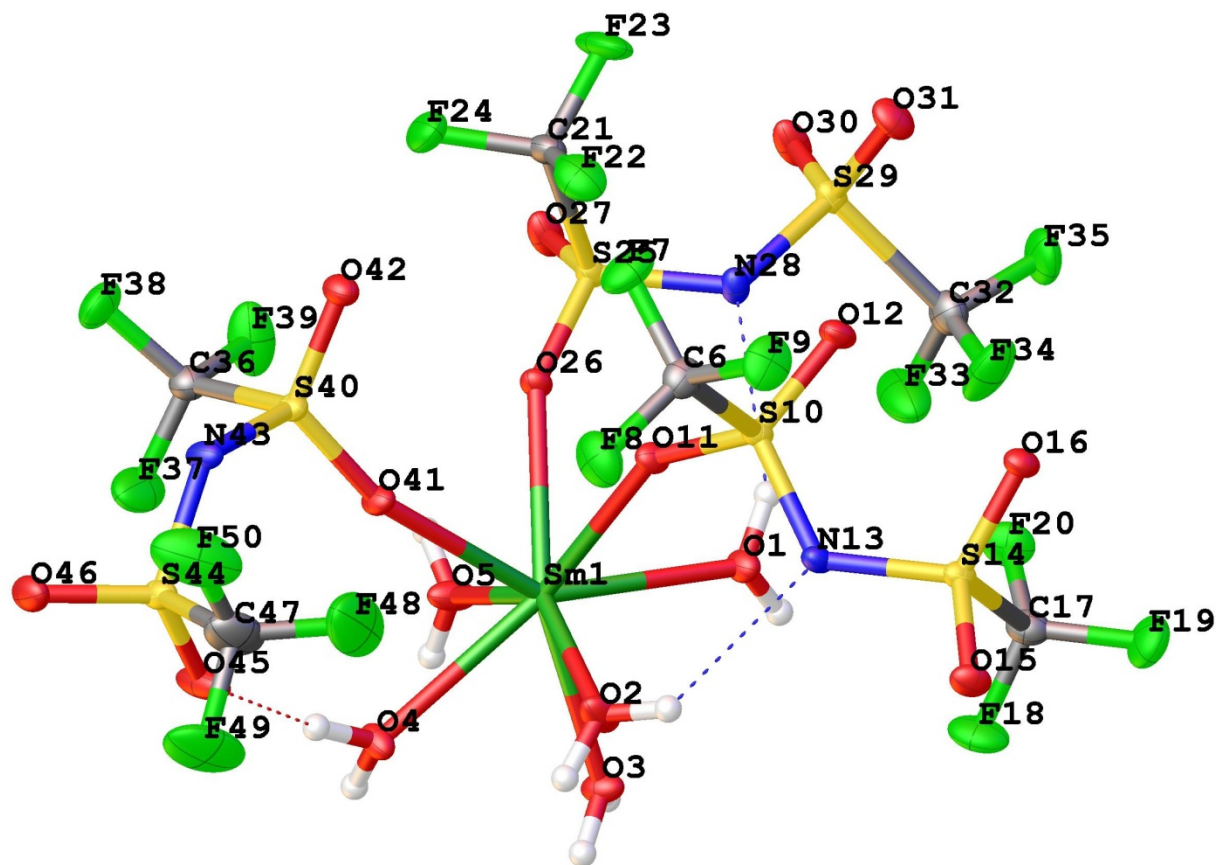

Figure S8. View of the crystal structure of  $\text{Sm}(\text{H}_2\text{O})_5(\text{Tf}_2\text{N})_3$  showing the crystallographic asymmetric unit and the displacement ellipsoids at the 50% probability level.

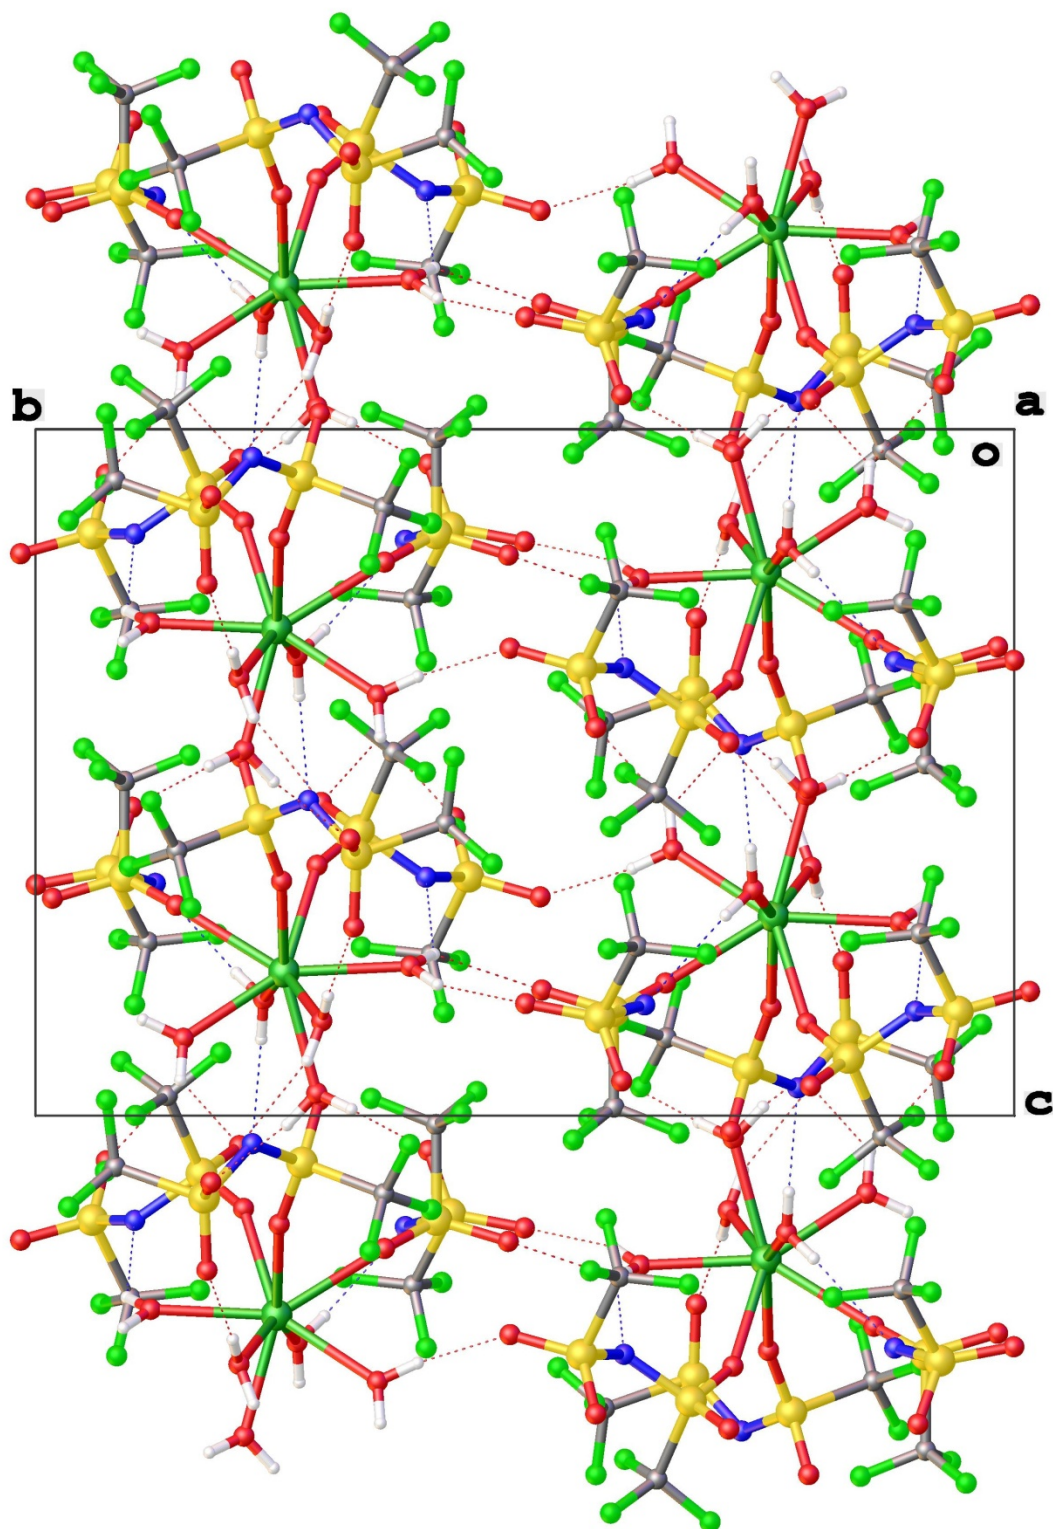

Figure S9. View of the packing in the crystal structure of  $\text{Sm}(\text{H}_2\text{O})_5(\text{Tf}_2\text{N})_3$ .

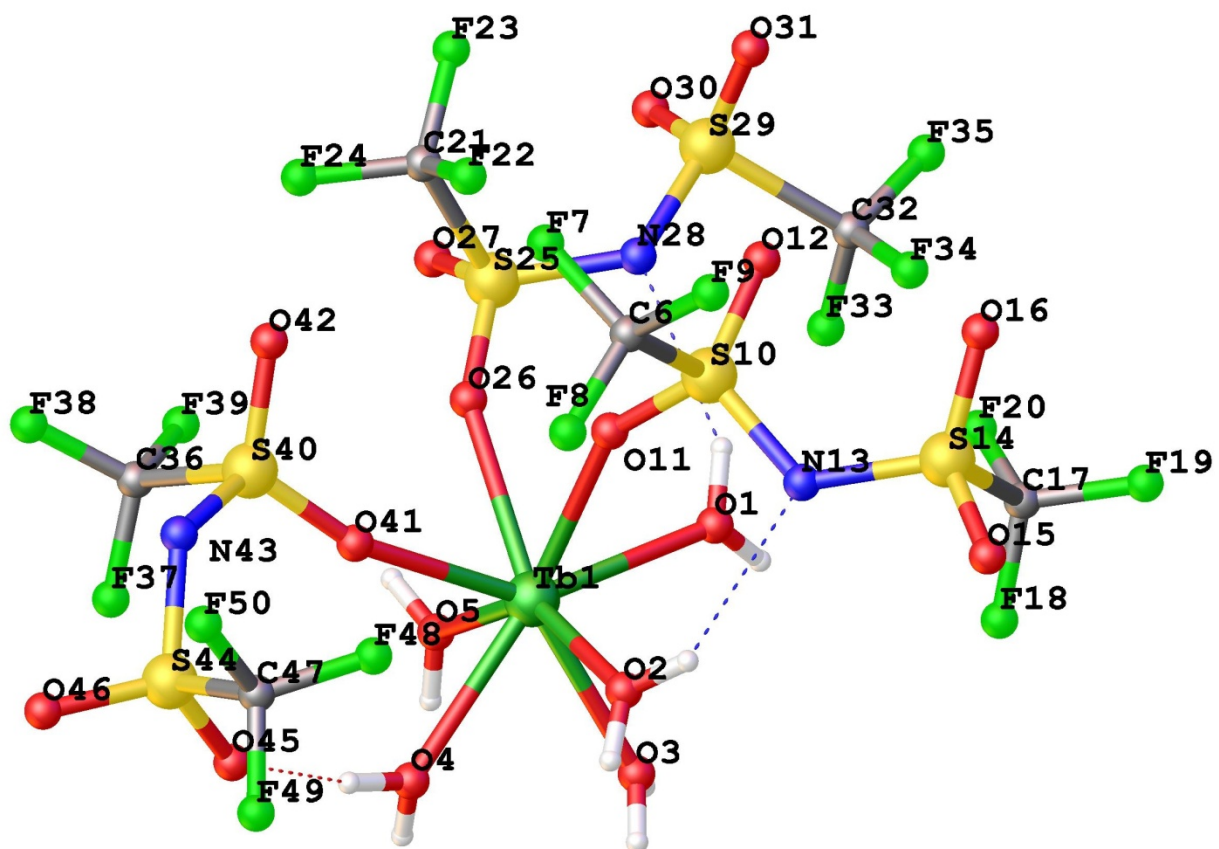

Figure S10. View of the crystal structure of  $\text{Tb}(\text{H}_2\text{O})_5(\text{Tf}_2\text{N})_3$  showing the crystallographic asymmetric unit and the displacement ellipsoids at the 50% probability level.

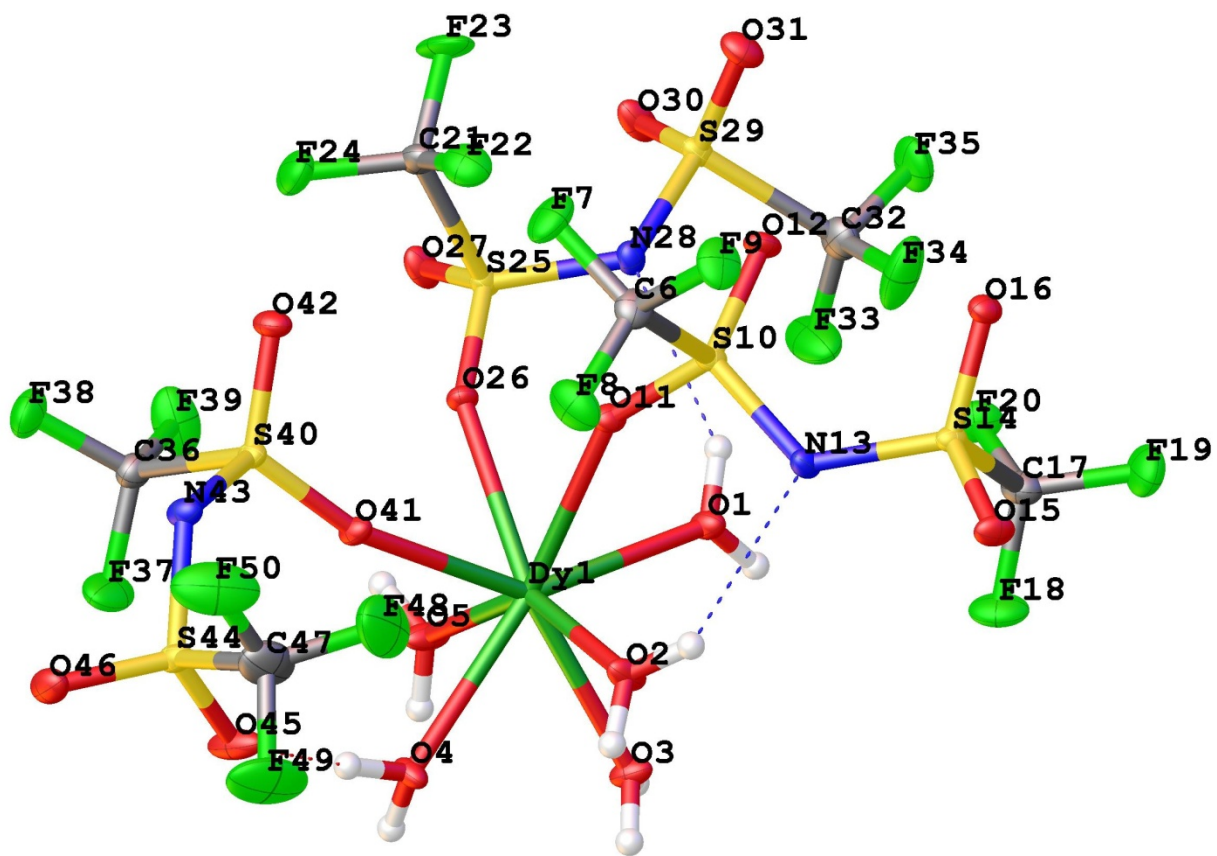

Figure S11. View of the crystal structure of  $\text{Dy}(\text{H}_2\text{O})_5(\text{Tf}_2\text{N})_3$  showing the crystallographic asymmetric unit and the displacement ellipsoids at the 50% probability level.



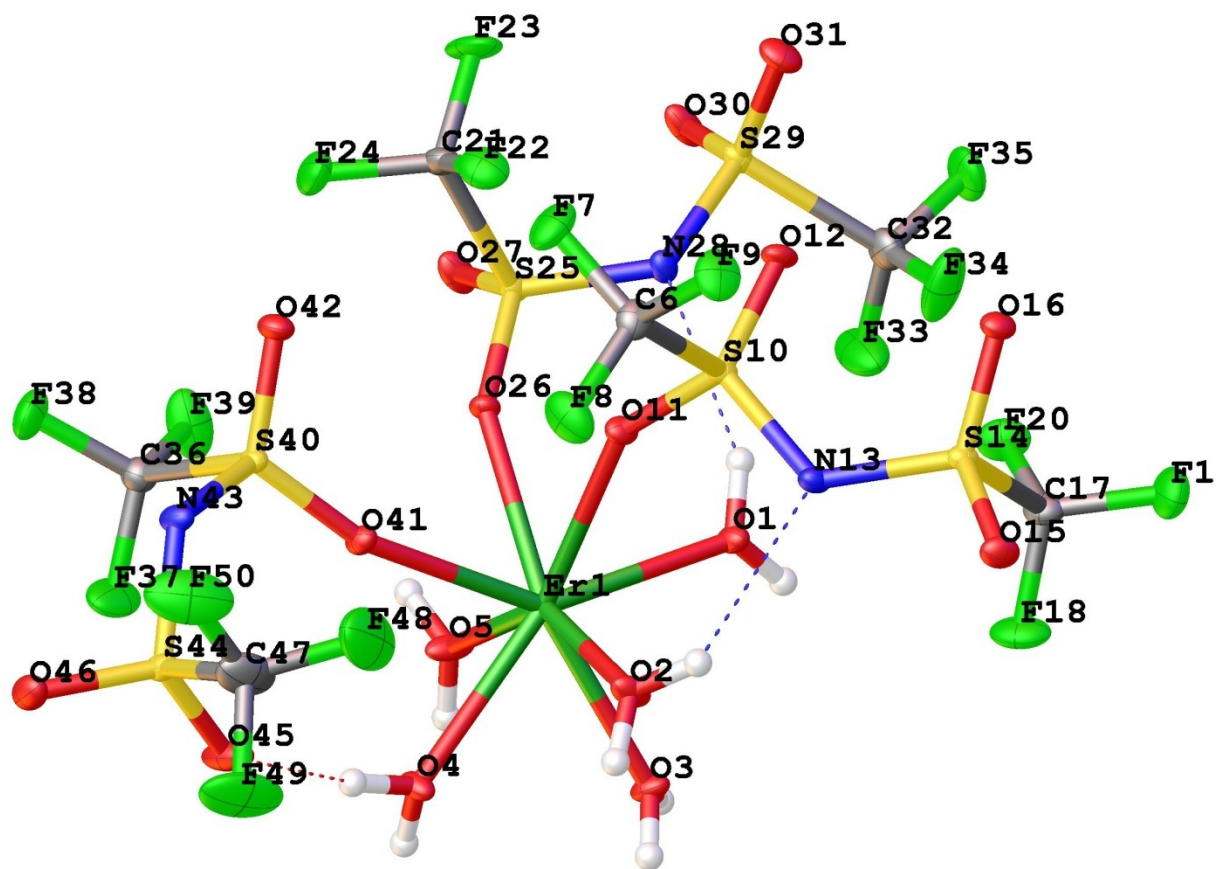

Figure S12. View of the crystal structure of  $\text{Er}(\text{H}_2\text{O})_5(\text{Tf}_2\text{N})_3$  showing the crystallographic asymmetric unit and the displacement ellipsoids at the 50% probability level.



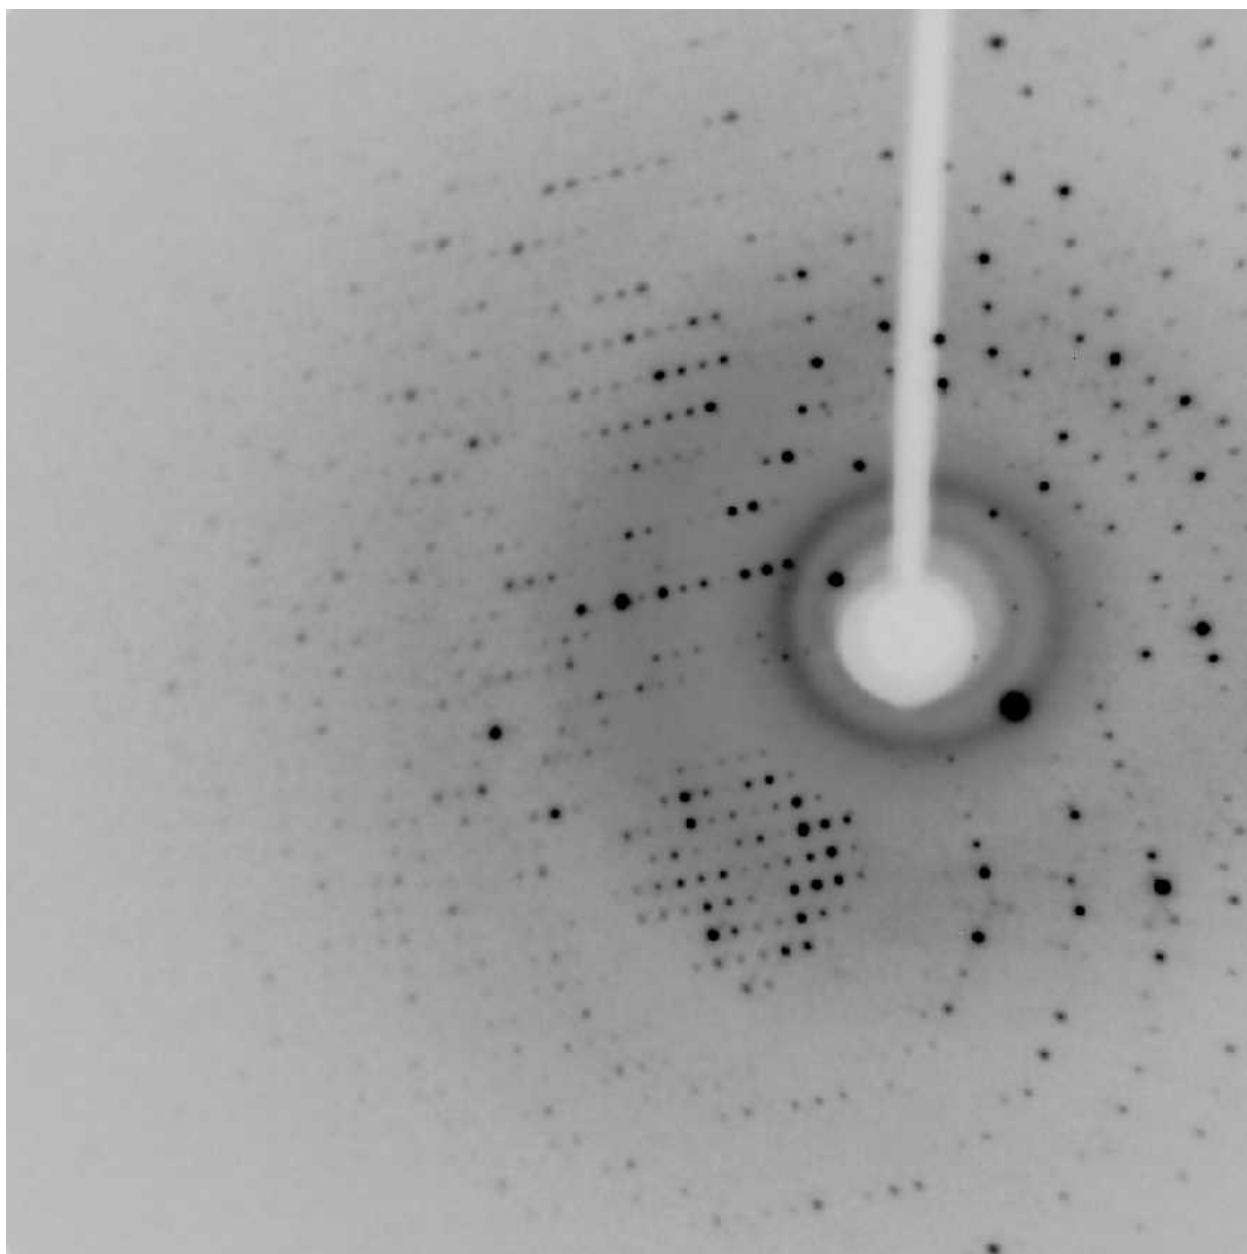

Figure S13. Example of a diffraction image for the fully hydrated structure of  $\text{Gd}(\text{Tf}_2\text{N})_3$ .

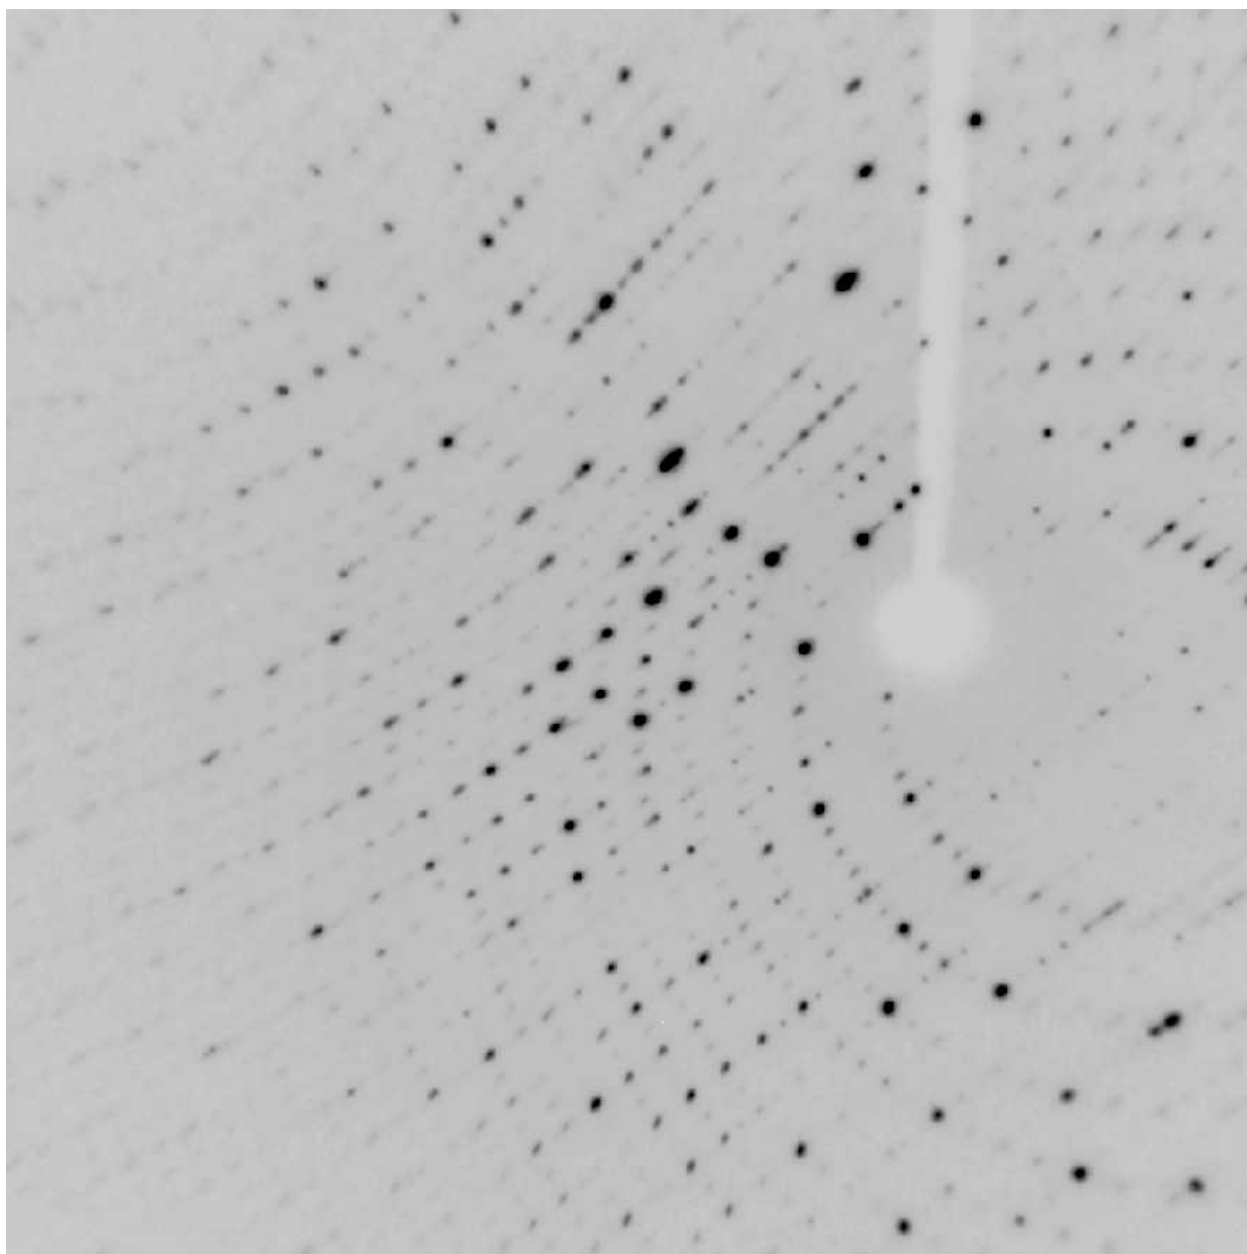

Figure S14. Example of a diffraction image for the fully hydrated structure of  $\text{Dy}(\text{Tf}_2\text{N})_3$ .

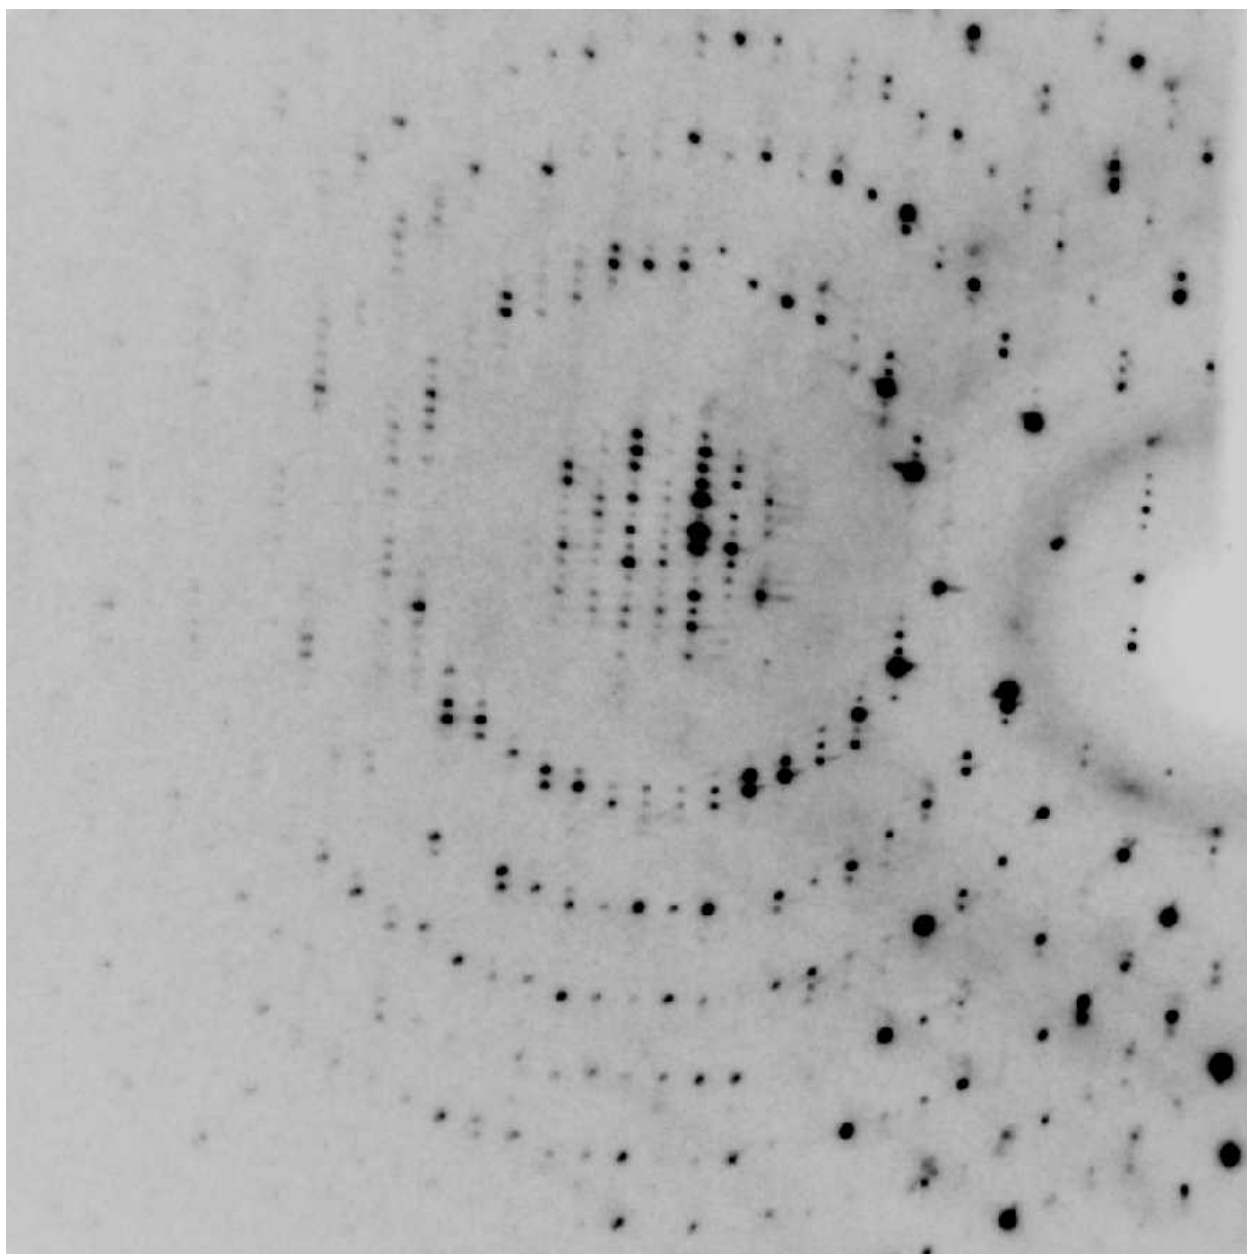

Figure S15. Example of a diffraction image for the fully hydrated structure of  $\text{Ho}(\text{Tf}_2\text{N})_3$ .

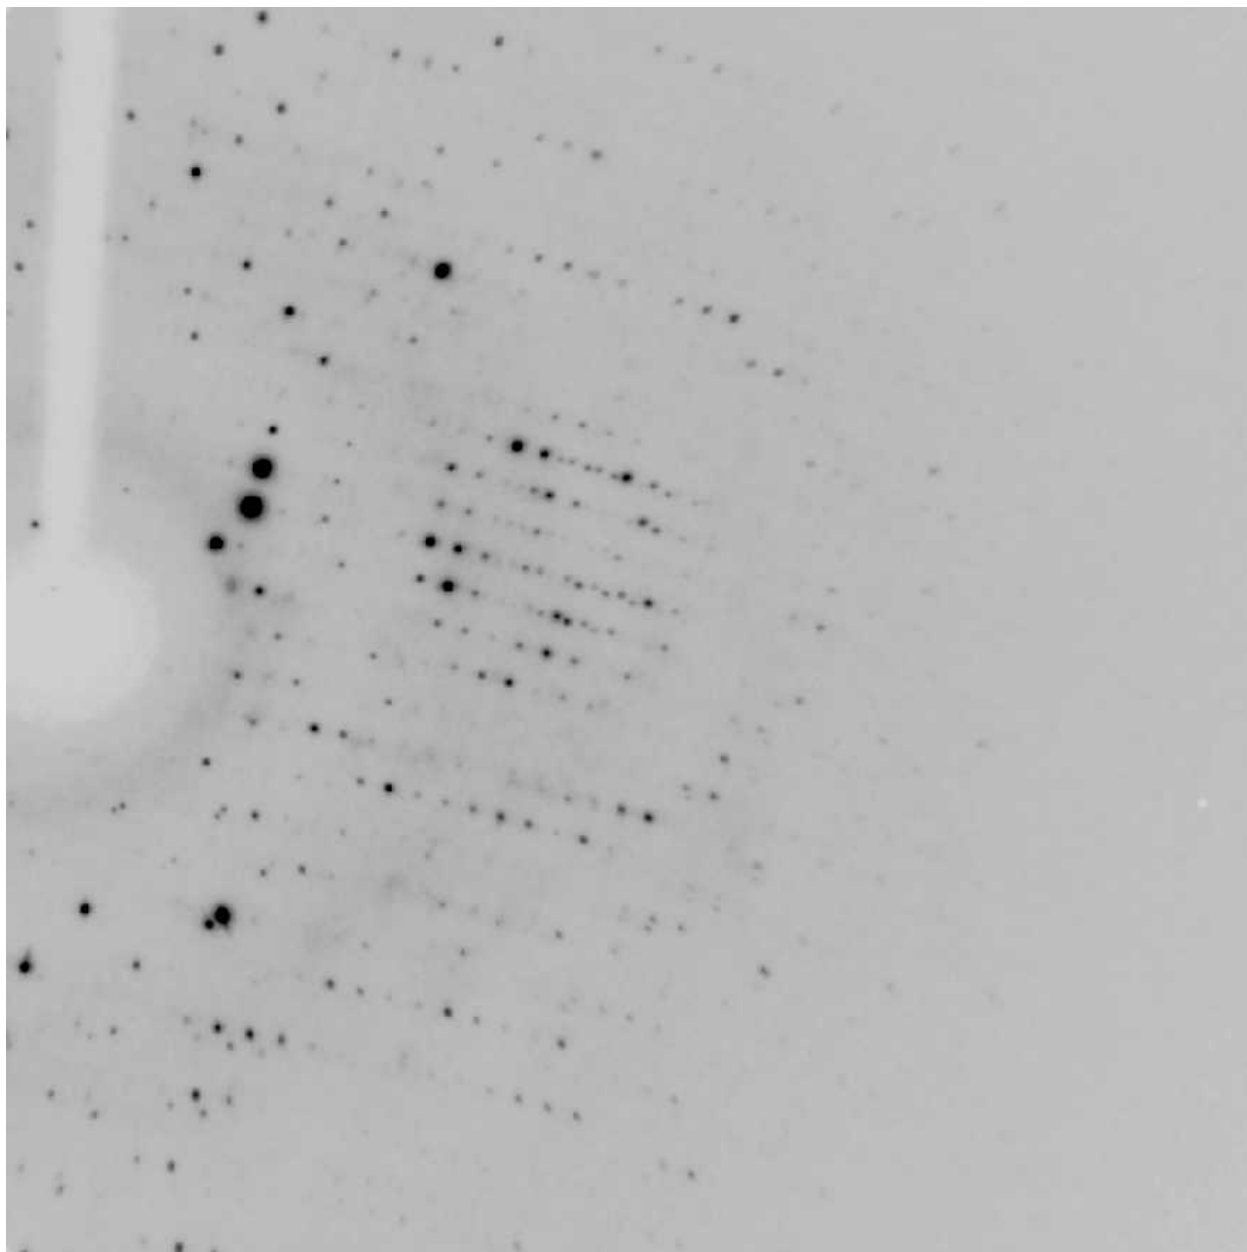

Figure S16. Example of a diffraction image for the fully hydrated structure of  $\text{Er}(\text{Tf}_2\text{N})_3$ .

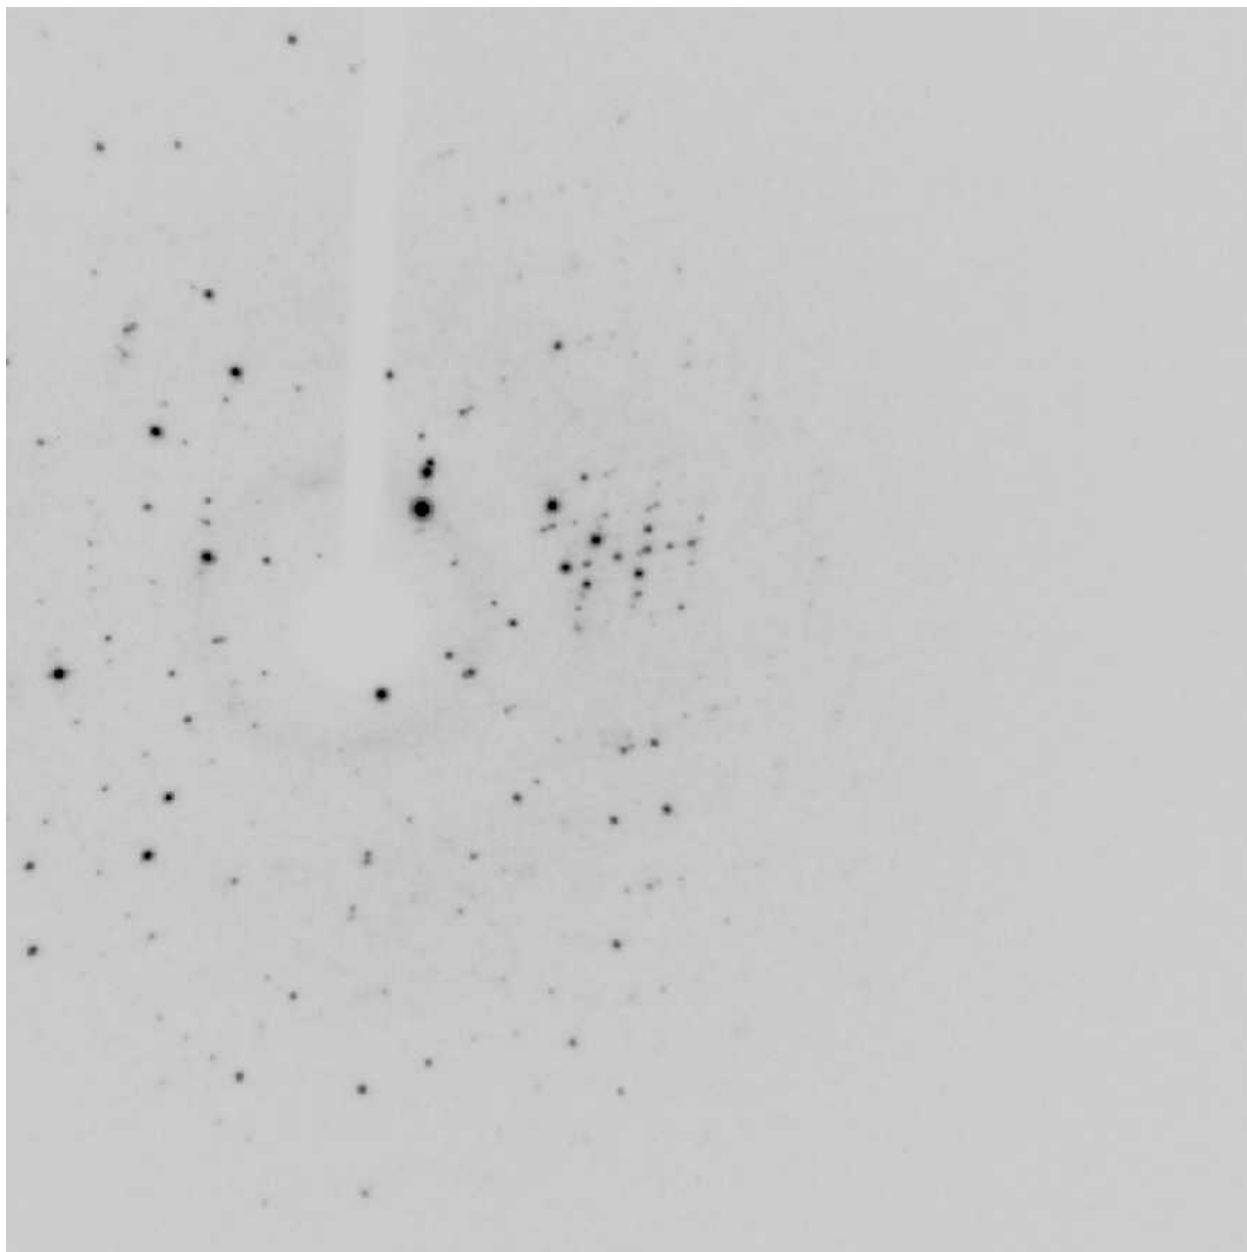

Figure S17. Example of a diffraction image for the fully hydrated structure of  $\text{Yb}(\text{Tf}_2\text{N})_3$ .

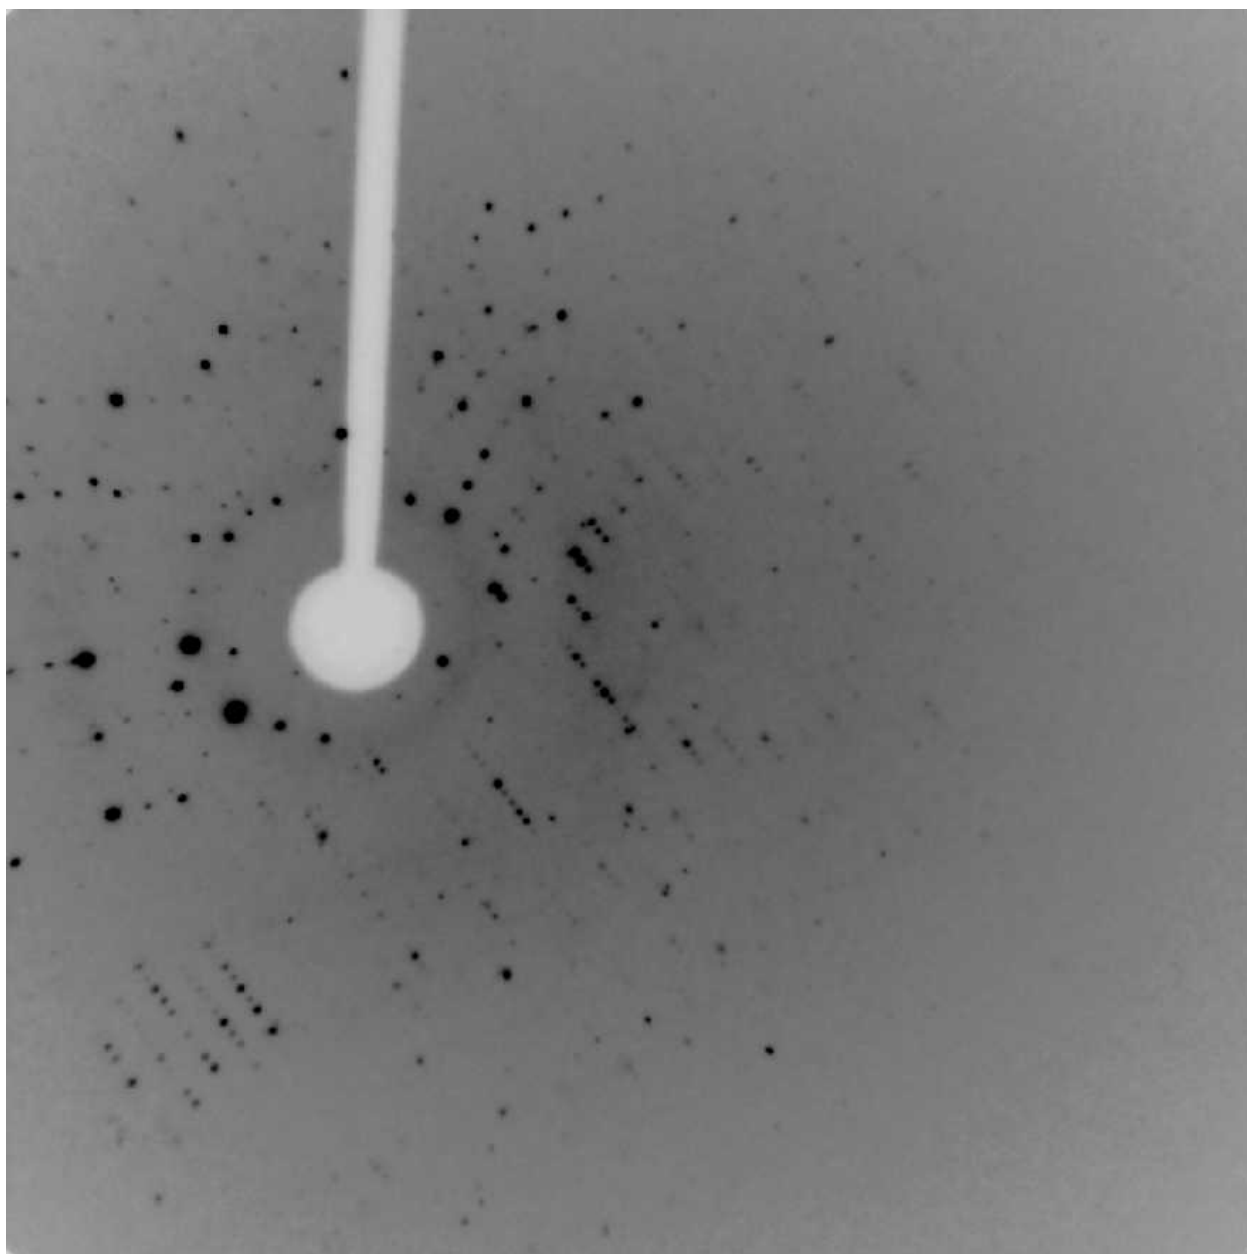

Figure S18. Example of a diffraction image for the fully hydrated structure of  $\text{Y}(\text{Tf}_2\text{N})_3$ .



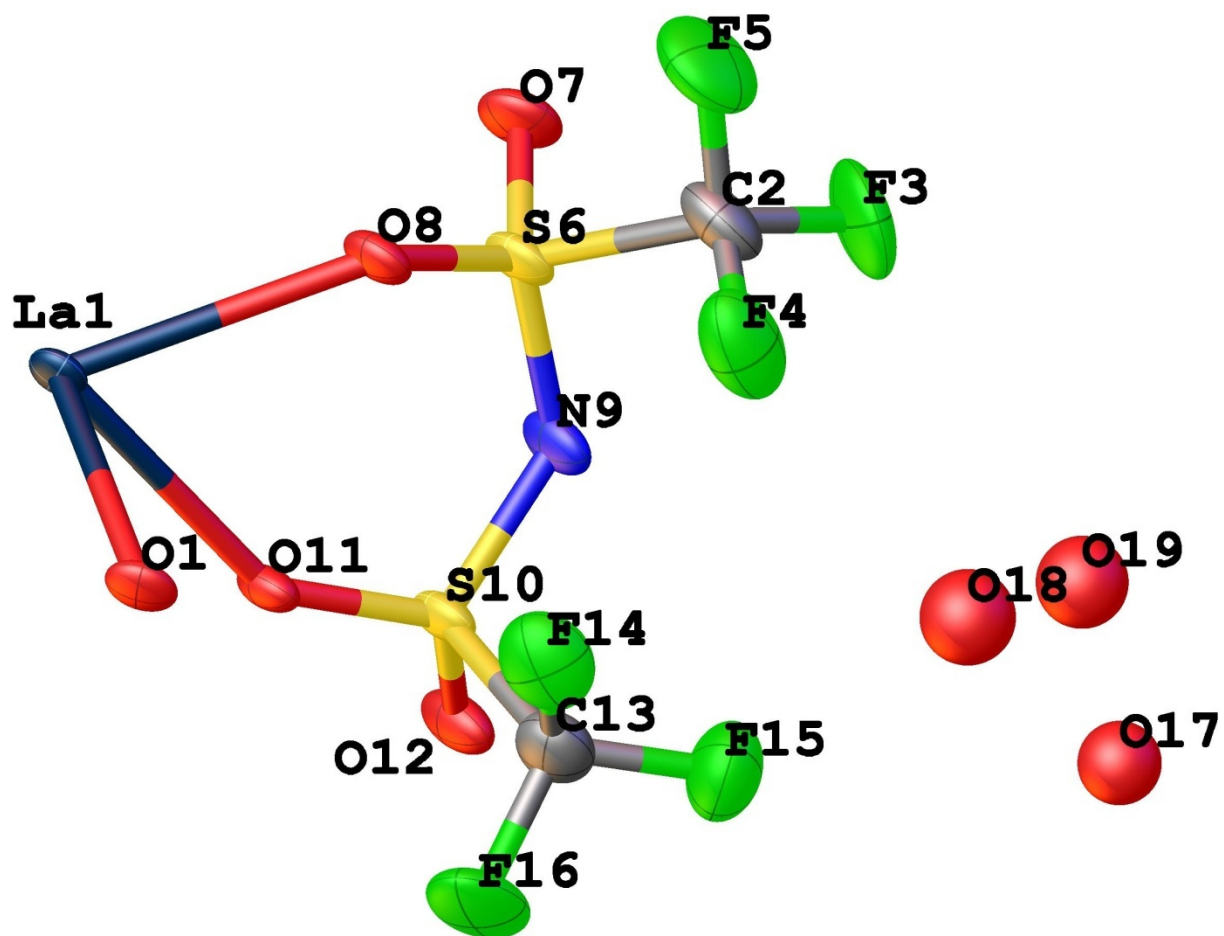

Figure S19. View of the crystal structure of  $\text{La}(\text{H}_2\text{O})_3(\text{Tf}_2\text{N})_3 \cdot 2.5\text{H}_2\text{O}$  showing the crystallographic asymmetric unit and the displacement ellipsoids at the 50% probability level.
